# Supplementary material for: Core–shell copper-gold nanoparticles modified at the boron-doped diamond electrode for oxygen sensors
Source: Royal Society of Chemistry journal article supplement (doi:10.1039/d1ay01942b), 2022-01-01
Supplement: d1ay01942b1.pdf [file d1ay01942b1.pdf]

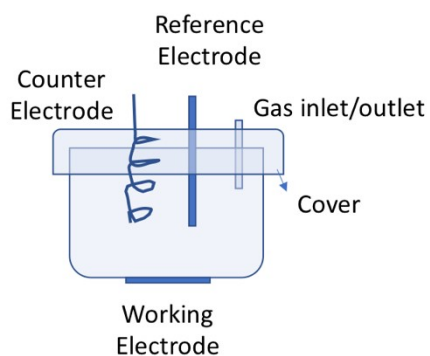

ESI 1. Scheme of the Electrochemical Cell

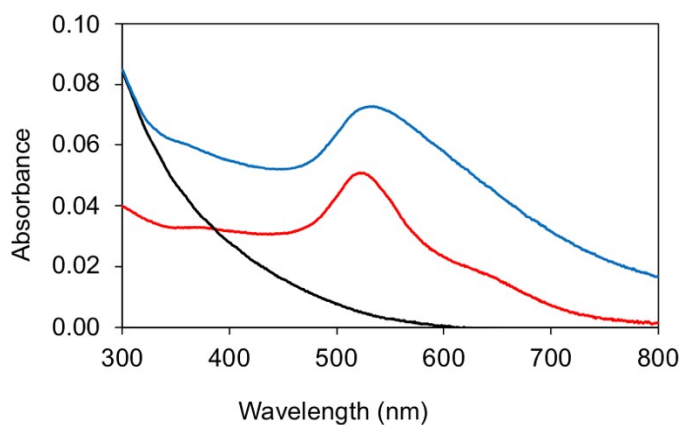

ESI 2. UV-Vis spectra of the prepared gold nanoparticles (red line), copper nanoparticles (black line), and Cu@Au nanoparticles (blue line).

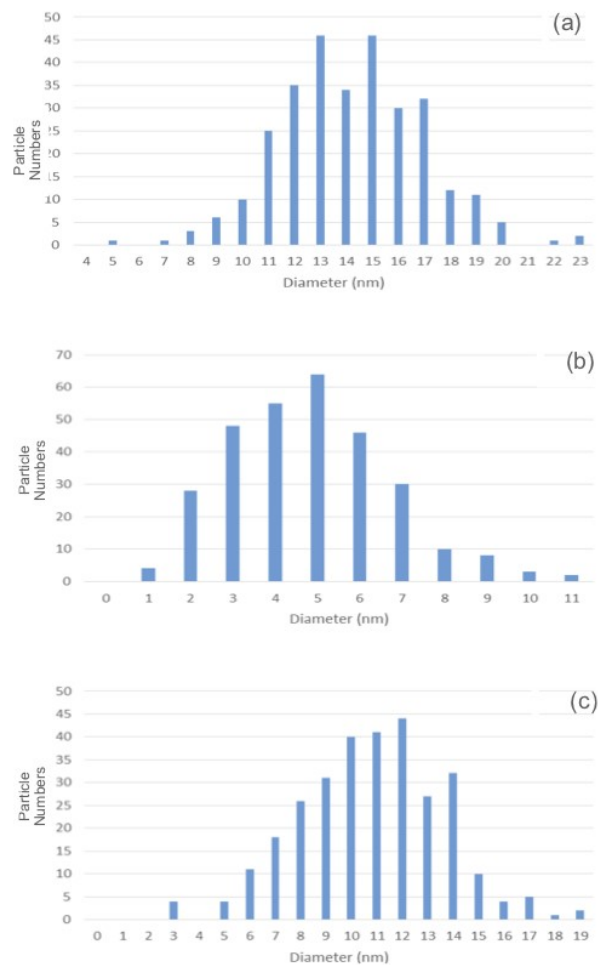

ESI 3. Particle Distributions of (a) gold, (b) copper, and (c) Au@Cu nanoparticles from TEM measurements, determined by using ImJ software

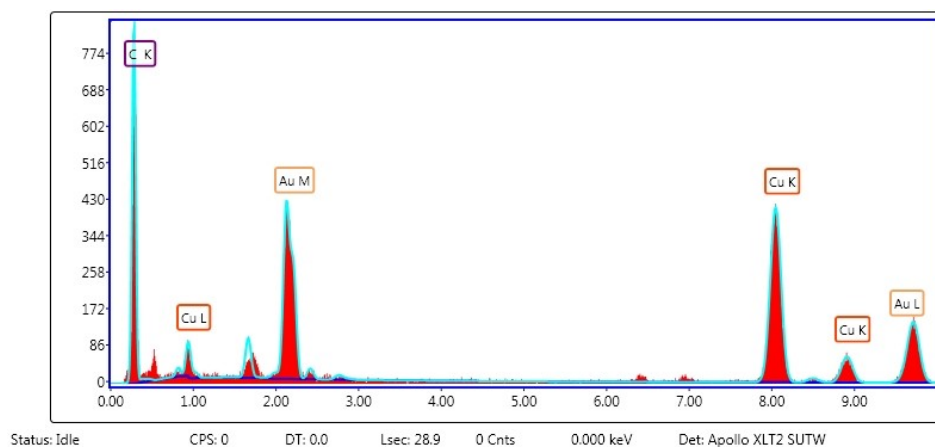

ESI 4. EDX spectra of Cu@Au nanoparticles, measured together with TEM

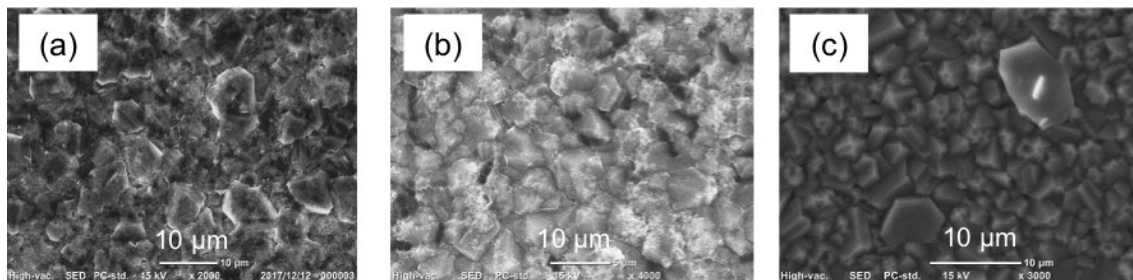

ESI 5. SEM Images of the surface of boron-doped diamond modified with Cu@Au nanoparticles (a), gold nanoparticles (b), and copper nanoparticles (c).
